# Supplementary material for: The Importance of Liming with an Appropriate Liming Material: Long-Term Experience with a Typic Palexerult
Source: MDPI journal article supplement (doi:10.3390/plants10122605), 2021-11-27
Supplement: s1 [file s1]

Article – Supplementary materials

# The Importance of Liming with an Appropriate Liming Material: Long-Term Experience with a Typic Paleixerult

Miguel Ángel Olego <sup>1,\*</sup>, Miguel Javier Quiroga <sup>1</sup>, Roberto López <sup>2</sup> and Enrique Garzón-Jimeno <sup>1</sup>

<sup>1</sup> Research Institute of Vine and Wine, Universidad de León, Avenida de Portugal, 41, CP 24071 León, Spain; germqm@unileon.es (M.J.Q.); jegarj@unileon.es (E.G.-J.)

<sup>2</sup> Physical Chemistry Area, Department of Chemistry and Physics, Faculty of Biology and Environmental Sciences, Campus de Vegazana, Universidad de León, CP 24071 León, Spain; rlopg@unileon.es

\* Correspondence: molem@unileon.es

## SUPPLEMENTARY MATERIALS

**Table S1.** Means and standard deviations (SD) of soil properties pH, SOM (soil organic matter in %), Ca, Mg, K and Al (calcium, magnesium, potassium and aluminium soil content respectively, in cmol (+)/kg) during ten years (2002–2011). Values within each column followed by different lowercase letters are significantly different according to Tukey's honest significance test with Holm-Bonferroni adjustment (0.05). Y: Year of sampling; D: Depth of sampling (Ap1 horizon: 0–12 cm, Ap2 horizon: 12–25 cm and AB horizon: 25–35 cm); T: Liming treatment (C: control; DL: dolomitic limestone; L: limestone).

| Y    | D   | T  | pH      |      | SOM     |      | Ca      |      | Mg     |      | K       |      | Al      |      |
|------|-----|----|---------|------|---------|------|---------|------|--------|------|---------|------|---------|------|
|      |     |    | Mean    | SD   | Mean    | SD   | Mean    | SD   | Mean   | SD   | Mean    | SD   | Mean    | SD   |
| 2002 | Ap1 | C  | 3.97 a  | 0.01 | 2.27 a  | 0.53 | 0.10 a  | 0.01 | 0.04 a | 0.02 | 0.09 a  | 0.03 | 1.30 b  | 0.26 |
| 2002 | Ap1 | DL | 6.49 b  | 0.60 | 2.35 a  | 0.61 | 4.61 b  | 1.68 | 2.53 b | 0.09 | 0.08 a  | 0.01 | 0.03 a  | 0.01 |
| 2002 | Ap1 | L  | 5.70 b  | 0.86 | 2.26 a  | 0.48 | 4.74 b  | 2.88 | 0.10 a | 0.01 | 0.07 a  | 0.01 | 0.05 a  | 0.03 |
| 2002 | Ap2 | C  | 4.01 a  | 0.02 | 2.06 ab | 0.54 | 0.14 a  | 0.07 | 0.04 a | 0.03 | 0.07 ab | 0.01 | 1.29 b  | 0.22 |
| 2002 | Ap2 | DL | 4.78 b  | 0.57 | 1.69 a  | 0.41 | 0.80 b  | 0.26 | 0.85 b | 0.39 | 0.06 a  | 0.01 | 0.40 a  | 0.51 |
| 2002 | Ap2 | L  | 4.16 a  | 0.06 | 2.44 b  | 0.53 | 1.04 b  | 0.14 | 0.10 a | 0.02 | 0.10 b  | 0.04 | 0.71 a  | 0.06 |
| 2002 | AB  | C  | 4.13 a  | 0.04 | 1.03 a  | 0.54 | 0.36 a  | 0.05 | 0.05 a | 0.01 | 0.04 a  | 0.00 | 1.33 a  | 0.23 |
| 2002 | AB  | DL | 4.19 a  | 0.14 | 0.72 a  | 0.10 | 0.66 a  | 0.44 | 0.43 b | 0.25 | 0.05 a  | 0.01 | 1.39 a  | 0.40 |
| 2002 | AB  | L  | 4.21 a  | 0.15 | 0.90 a  | 0.45 | 0.64 a  | 0.29 | 0.04 a | 0.01 | 0.05 a  | 0.01 | 1.08 a  | 0.27 |
| 2003 | Ap1 | C  | 3.79 a  | 0.07 | 1.92 a  | 0.32 | 0.20 a  | 0.12 | 0.04 a | 0.03 | 0.06 a  | 0.02 | 1.24 b  | 0.05 |
| 2003 | Ap1 | DL | 6.02 c  | 0.60 | 1.81 a  | 0.18 | 4.14 b  | 0.24 | 1.44 b | 0.94 | 0.07 a  | 0.01 | 0.03 a  | 0.01 |
| 2003 | Ap1 | L  | 5.31 b  | 0.15 | 2.13 a  | 0.26 | 4.04 b  | 0.49 | 0.06 a | 0.02 | 0.08 a  | 0.05 | 0.07 a  | 0.06 |
| 2003 | Ap2 | C  | 3.79 a  | 0.04 | 1.98 a  | 0.28 | 0.24 a  | 0.10 | 0.05 a | 0.00 | 0.07 a  | 0.02 | 1.20 b  | 0.07 |
| 2003 | Ap2 | DL | 4.95 b  | 0.57 | 1.74 a  | 0.16 | 2.33 b  | 0.23 | 0.87 b | 0.75 | 0.08 a  | 0.00 | 0.10 a  | 0.08 |
| 2003 | Ap2 | L  | 4.09 a  | 0.17 | 1.92 a  | 0.18 | 1.48 b  | 1.19 | 0.04 a | 0.02 | 0.06 a  | 0.02 | 0.84 b  | 0.68 |
| 2003 | AB  | C  | 3.91 a  | 0.03 | 0.90 a  | 0.43 | 0.11 a  | 0.13 | 0.05 a | 0.03 | 0.06 a  | 0.02 | 1.25 b  | 0.17 |
| 2003 | AB  | DL | 4.22 b  | 0.21 | 0.97 a  | 0.42 | 0.99 b  | 0.13 | 0.28 b | 0.19 | 0.06 a  | 0.00 | 0.45 a  | 0.26 |
| 2003 | AB  | L  | 4.04 ab | 0.08 | 0.80 a  | 0.05 | 0.85 b  | 0.15 | 0.06 a | 0.04 | 0.06 a  | 0.01 | 1.06 b  | 0.48 |
| 2004 | Ap1 | C  | 3.84 a  | 0.05 | 2.40 b  | 0.33 | 0.59 a  | 0.30 | 0.02 a | 0.01 | 0.08 a  | 0.04 | 3.01 b  | 0.45 |
| 2004 | Ap1 | DL | 6.74 c  | 0.52 | 2.30 ab | 0.11 | 4.19 b  | 1.47 | 1.22 b | 0.83 | 0.05 a  | 0.01 | 1.01 a  | 0.47 |
| 2004 | Ap1 | L  | 5.32 b  | 0.65 | 2.01 a  | 0.15 | 3.70 b  | 0.28 | 0.09 a | 0.05 | 0.05 a  | 0.01 | 0.47 a  | 0.11 |
| 2004 | Ap2 | C  | 4.01 a  | 0.25 | 2.20 a  | 0.94 | 0.30 a  | 0.20 | 0.02 a | 0.01 | 0.08 b  | 0.04 | 1.77 b  | 0.18 |
| 2004 | Ap2 | DL | 5.01 b  | 0.27 | 1.83 a  | 0.52 | 1.60 b  | 0.03 | 1.36 b | 0.95 | 0.04 ab | 0.01 | 1.57 ab | 0.67 |
| 2004 | Ap2 | L  | 4.36 a  | 0.24 | 2.34 a  | 0.11 | 1.65 b  | 0.20 | 0.06 a | 0.03 | 0.06 a  | 0.01 | 0.84 a  | 0.66 |
| 2004 | AB  | C  | 4.00 a  | 0.08 | 0.67 a  | 0.11 | 0.53 a  | 0.43 | 0.05 a | 0.04 | 0.04 a  | 0.01 | 2.17 a  | 1.20 |
| 2004 | AB  | DL | 4.15 a  | 0.18 | 0.83 a  | 0.09 | 0.76 a  | 0.36 | 0.54 b | 0.45 | 0.04 a  | 0.01 | 2.05 a  | 0.86 |
| 2004 | AB  | L  | 4.11 a  | 0.06 | 0.79 a  | 0.18 | 0.98 a  | 0.13 | 0.08 a | 0.06 | 0.04 a  | 0.01 | 1.96 a  | 0.65 |
| 2005 | Ap1 | C  | 3.74 a  | 0.06 | 2.33 a  | 0.08 | 0.07 a  | 0.04 | 0.02 a | 0.01 | 0.14 b  | 0.05 | 1.59 b  | 0.37 |
| 2005 | Ap1 | DL | 6.42 c  | 0.23 | 2.37 a  | 0.76 | 7.02 b  | 1.83 | 1.53 b | 0.53 | 0.09 a  | 0.03 | 0.88 a  | 0.70 |
| 2005 | Ap1 | L  | 5.26 b  | 0.24 | 2.51 a  | 0.41 | 5.25 b  | 1.51 | 0.11 a | 0.01 | 0.11 ab | 0.02 | 0.54 a  | 0.23 |
| 2005 | Ap2 | C  | 3.76 a  | 0.04 | 2.30 a  | 0.23 | 0.21 a  | 0.13 | 0.03 a | 0.01 | 0.10 b  | 0.04 | 2.13 b  | 0.43 |
| 2005 | Ap2 | DL | 4.34 c  | 0.24 | 2.43 a  | 0.66 | 1.40 c  | 0.42 | 1.16 b | 0.23 | 0.05 a  | 0.00 | 0.56 a  | 0.35 |
| 2005 | Ap2 | L  | 4.05 b  | 0.14 | 2.03 a  | 0.13 | 0.91 b  | 0.11 | 0.02 a | 0.01 | 0.04 a  | 0.02 | 1.67 b  | 0.41 |
| 2005 | AB  | C  | 3.84 a  | 0.03 | 0.65 a  | 0.22 | 0.16 a  | 0.06 | 0.01 a | 0.01 | 0.03 a  | 0.03 | 2.04 a  | 0.53 |
| 2005 | AB  | DL | 3.93 a  | 0.19 | 1.03 a  | 0.50 | 0.36 ab | 0.20 | 0.47 b | 0.12 | 0.04 a  | 0.02 | 1.70 a  | 0.52 |
| 2005 | AB  | L  | 3.88 a  | 0.04 | 0.81 a  | 0.15 | 0.61 b  | 0.29 | 0.04 a | 0.04 | 0.03 a  | 0.02 | 2.31 a  | 0.29 |

| Y    | D   | T  | pH     |      | SOM     |      | Ca      |      | Mg     |      | K       |      | Al      |      |
|------|-----|----|--------|------|---------|------|---------|------|--------|------|---------|------|---------|------|
|      |     |    | Mean   | SD   | Mean    | SD   | Mean    | SD   | Mean   | SD   | Mean    | SD   | Mean    | SD   |
| 2006 | Ap1 | C  | 3.93 a | 0.09 | 2.54 a  | 0.44 | 0.24 a  | 0.15 | 0.02 a | 0.02 | 0.11 b  | 0.04 | 2.04 b  | 0.92 |
| 2006 | Ap1 | DL | 5.77 b | 1.23 | 2.24 a  | 0.42 | 5.98 b  | 2.18 | 0.90 b | 0.32 | 0.08 ab | 0.03 | 0.46 a  | 0.22 |
| 2006 | Ap1 | L  | 5.49 b | 0.35 | 2.15 a  | 0.47 | 4.72 b  | 1.37 | 0.05 a | 0.02 | 0.07 a  | 0.02 | 0.35 a  | 0.25 |
| 2006 | Ap2 | C  | 4.07 a | 0.14 | 1.72 a  | 0.38 | 0.08 a  | 0.03 | 0.02 a | 0.00 | 0.08 b  | 0.04 | 1.37 b  | 0.24 |
| 2006 | Ap2 | DL | 5.06 b | 0.86 | 1.67 a  | 0.25 | 2.83 b  | 2.42 | 1.23 b | 0.35 | 0.06 ab | 0.04 | 0.36 a  | 0.15 |
| 2006 | Ap2 | L  | 4.15 a | 0.06 | 2.23 b  | 0.26 | 1.26 ab | 0.03 | 0.01 a | 0.01 | 0.01 a  | 0.01 | 1.59 b  | 0.89 |
| 2006 | AB  | C  | 3.92 a | 0.06 | 0.48 a  | 0.04 | 0.41 a  | 0.30 | 0.04 a | 0.03 | 0.02 a  | 0.02 | 1.51 a  | 0.43 |
| 2006 | AB  | DL | 3.95 a | 0.08 | 0.57 a  | 0.10 | 0.65 a  | 0.37 | 0.80 b | 0.30 | 0.03 a  | 0.02 | 1.57 a  | 0.78 |
| 2006 | AB  | L  | 4.00 a | 0.12 | 1.02 b  | 0.28 | 0.77 a  | 0.51 | 0.02 a | 0.02 | 0.01 a  | 0.01 | 3.20 b  | 0.53 |
| 2007 | Ap1 | C  | 3.92 a | 0.06 | 2.22 a  | 0.31 | 0.27 a  | 0.17 | 0.08 a | 0.03 | 0.08 b  | 0.03 | 2.90 b  | 1.31 |
| 2007 | Ap1 | DL | 6.04 c | 0.66 | 2.43 a  | 0.65 | 3.71 b  | 0.92 | 0.97 b | 0.39 | 0.08 b  | 0.01 | 0.63 a  | 0.32 |
| 2007 | Ap1 | L  | 4.67 b | 0.27 | 2.58 a  | 0.32 | 2.60 b  | 1.00 | 0.04 a | 0.03 | 0.05 a  | 0.01 | 0.57 a  | 0.29 |
| 2007 | Ap2 | C  | 3.98 a | 0.05 | 1.92 a  | 0.46 | 0.18 a  | 0.17 | 0.09 a | 0.02 | 0.06 a  | 0.02 | 3.06 b  | 1.24 |
| 2007 | Ap2 | DL | 4.57 c | 0.07 | 1.97 a  | 0.27 | 1.03 b  | 0.11 | 0.95 b | 0.29 | 0.05 a  | 0.03 | 0.93 a  | 0.38 |
| 2007 | Ap2 | L  | 4.30 b | 0.17 | 2.18 a  | 0.31 | 1.57 c  | 0.45 | 0.03 a | 0.03 | 0.03 a  | 0.02 | 1.04 a  | 0.42 |
| 2007 | AB  | C  | 4.05 a | 0.06 | 0.58 a  | 0.18 | 0.13 a  | 0.09 | 0.08 a | 0.03 | 0.06 b  | 0.02 | 2.92 a  | 1.24 |
| 2007 | AB  | DL | 4.00 a | 0.16 | 0.63 a  | 0.09 | 0.26 a  | 0.22 | 0.19 b | 0.06 | 0.02 a  | 0.01 | 2.58 a  | 0.78 |
| 2007 | AB  | L  | 4.00 a | 0.05 | 0.66 a  | 0.12 | 0.46 b  | 0.06 | 0.07 a | 0.01 | 0.02 a  | 0.01 | 2.17 a  | 0.54 |
| 2008 | Ap1 | C  | 4.07 a | 0.11 | 2.12 a  | 0.15 | 0.09 a  | 0.08 | 0.05 a | 0.01 | 0.09 a  | 0.04 | 2.10 b  | 0.92 |
| 2008 | Ap1 | DL | 6.07 c | 0.38 | 2.13 a  | 0.13 | 3.78 b  | 1.20 | 0.88 b | 0.07 | 0.07 a  | 0.04 | 1.04 ab | 0.70 |
| 2008 | Ap1 | L  | 5.48 b | 0.36 | 2.29 a  | 0.13 | 3.65 b  | 0.63 | 0.09 a | 0.02 | 0.07 a  | 0.06 | 0.82 a  | 0.61 |
| 2008 | Ap2 | C  | 4.11 a | 0.04 | 2.07 a  | 0.48 | 0.10 a  | 0.08 | 0.04 a | 0.01 | 0.09 a  | 0.03 | 1.49 b  | 0.34 |
| 2008 | Ap2 | DL | 5.56 b | 0.75 | 1.99 a  | 0.39 | 2.97 b  | 0.87 | 0.74 b | 0.26 | 0.12 a  | 0.10 | 0.51 a  | 0.10 |
| 2008 | Ap2 | L  | 4.72 a | 0.25 | 2.31 a  | 0.29 | 2.33 b  | 0.16 | 0.04 a | 0.02 | 0.05 a  | 0.03 | 0.59 a  | 0.25 |
| 2008 | AB  | C  | 4.16 a | 0.15 | 0.89 a  | 0.14 | 0.16 a  | 0.07 | 0.04 a | 0.02 | 0.06 b  | 0.01 | 2.16 b  | 0.85 |
| 2008 | AB  | DL | 4.98 b | 0.27 | 1.44 ab | 0.66 | 1.72 b  | 0.27 | 0.97 b | 0.23 | 0.04 a  | 0.01 | 0.99 a  | 0.37 |
| 2008 | AB  | L  | 4.42 a | 0.23 | 1.67 b  | 0.14 | 1.52 b  | 0.78 | 0.03 a | 0.02 | 0.03 a  | 0.03 | 1.41 ab | 0.89 |
| 2009 | Ap1 | C  | 3.98 a | 0.33 | 1.54 a  | 0.41 | 0.16 a  | 0.12 | 0.05 a | 0.02 | 0.10 b  | 0.03 | 2.72 c  | 0.16 |
| 2009 | Ap1 | DL | 5.46 b | 0.82 | 1.57 a  | 0.46 | 3.58 c  | 0.42 | 0.84 b | 0.66 | 0.07 ab | 0.05 | 0.97 a  | 0.16 |
| 2009 | Ap1 | L  | 4.53 a | 0.04 | 2.03 a  | 0.14 | 1.98 b  | 0.14 | 0.07 a | 0.03 | 0.04 a  | 0.00 | 1.44 b  | 0.28 |
| 2009 | Ap2 | C  | 3.94 a | 0.09 | 1.57 a  | 0.11 | 0.22 a  | 0.16 | 0.04 a | 0.02 | 0.07 b  | 0.02 | 2.05 b  | 0.20 |
| 2009 | Ap2 | DL | 4.60 b | 0.27 | 1.62 a  | 0.30 | 1.56 b  | 0.44 | 0.78 b | 0.16 | 0.03 a  | 0.01 | 0.84 a  | 0.46 |
| 2009 | Ap2 | L  | 4.15 a | 0.17 | 1.76 a  | 0.18 | 1.12 b  | 0.61 | 0.05 a | 0.03 | 0.02 a  | 0.01 | 1.68 ab | 1.26 |
| 2009 | AB  | C  | 4.05 a | 0.02 | 0.67 a  | 0.20 | 0.23 a  | 0.17 | 0.04 a | 0.02 | 0.02 a  | 0.02 | 2.54 a  | 1.03 |
| 2009 | AB  | DL | 4.19 b | 0.04 | 0.62 a  | 0.19 | 0.58 b  | 0.22 | 0.45 b | 0.35 | 0.01 a  | 0.01 | 1.62 a  | 0.53 |
| 2009 | AB  | L  | 4.04 a | 0.06 | 0.68 a  | 0.11 | 0.39 ab | 0.15 | 0.04 a | 0.01 | 0.01 a  | 0.01 | 2.19 a  | 0.50 |
| 2010 | Ap1 | C  | 3.83 a | 0.09 | 2.03 a  | 0.41 | 0.14 a  | 0.06 | 0.05 a | 0.04 | 0.12 a  | 0.03 | 2.31 b  | 0.52 |
| 2010 | Ap1 | DL | 5.62 c | 0.02 | 1.85 a  | 0.03 | 3.64 b  | 0.63 | 1.03 b | 0.49 | 0.09 a  | 0.01 | 0.20 a  | 0.08 |
| 2010 | Ap1 | L  | 4.81 b | 0.36 | 1.90 a  | 0.03 | 2.87 b  | 0.88 | 0.03 a | 0.02 | 0.10 a  | 0.04 | 0.25 a  | 0.01 |
| 2010 | Ap2 | C  | 4.12 a | 0.38 | 1.77 a  | 0.31 | 0.11 a  | 0.06 | 0.06 a | 0.03 | 0.11 b  | 0.02 | 1.62 b  | 0.56 |

| Y    | D   | T  | pH     |      | SOM    |      | Ca     |      | Mg     |      | K       |      | Al      |      |
|------|-----|----|--------|------|--------|------|--------|------|--------|------|---------|------|---------|------|
|      |     |    | Mean   | SD   | Mean   | SD   | Mean   | SD   | Mean   | SD   | Mean    | SD   | Mean    | SD   |
| 2010 | Ap2 | DL | 4.70 a | 0.57 | 1.58 a | 0.13 | 1.63 b | 0.44 | 0.67 b | 0.17 | 0.07 a  | 0.00 | 0.80 a  | 0.56 |
| 2010 | Ap2 | L  | 4.42 a | 0.31 | 1.76 a | 0.09 | 1.96 b | 0.85 | 0.06 a | 0.03 | 0.09 ab | 0.03 | 0.68 a  | 0.52 |
| 2010 | AB  | C  | 4.31 a | 0.35 | 0.70 a | 0.13 | 0.12 a | 0.10 | 0.06 a | 0.01 | 0.09 b  | 0.03 | 2.62 a  | 0.98 |
| 2010 | AB  | DL | 4.08 a | 0.09 | 0.60 a | 0.09 | 0.40 a | 0.12 | 0.24 b | 0.12 | 0.06 a  | 0.01 | 2.33 a  | 1.23 |
| 2010 | AB  | L  | 4.04 a | 0.12 | 0.63 a | 0.16 | 0.91 b | 0.42 | 0.05 a | 0.04 | 0.08 ab | 0.01 | 2.32 a  | 1.37 |
| 2011 | Ap1 | C  | 3.99 a | 0.08 | 2.02 a | 0.10 | 0.23 a | 0.03 | 0.15 a | 0.02 | 0.25 a  | 0.09 | 1.84 b  | 0.52 |
| 2011 | Ap1 | DL | 5.00 b | 0.27 | 2.20 a | 0.45 | 4.31 b | 1.31 | 1.27 b | 0.37 | 0.23 a  | 0.14 | 0.56 a  | 0.31 |
| 2011 | Ap1 | L  | 4.77 b | 0.13 | 2.12 a | 0.10 | 4.00 b | 0.63 | 0.26 a | 0.02 | 0.43 a  | 0.28 | 1.07 a  | 0.41 |
| 2011 | Ap2 | C  | 4.06 a | 0.11 | 1.51 a | 0.53 | 0.09 a | 0.04 | 0.14 a | 0.01 | 0.24 a  | 0.09 | 2.52 a  | 0.36 |
| 2011 | Ap2 | DL | 4.94 b | 0.42 | 1.95 a | 0.86 | 3.54 c | 1.02 | 1.20 b | 0.25 | 0.23 a  | 0.13 | 1.76 a  | 1.77 |
| 2011 | Ap2 | L  | 4.38 a | 0.12 | 2.14 a | 0.20 | 2.36 b | 0.30 | 0.21 a | 0.02 | 0.33 a  | 0.18 | 1.32 a  | 0.58 |
| 2011 | AB  | C  | 4.14 a | 0.04 | 0.90 a | 0.17 | 0.09 a | 0.04 | 0.14 a | 0.01 | 0.24 a  | 0.10 | 2.16 ab | 0.32 |
| 2011 | AB  | DL | 4.23 a | 0.20 | 1.77 a | 1.10 | 1.73 b | 1.03 | 0.81 b | 0.17 | 0.23 a  | 0.14 | 3.13 b  | 0.55 |
| 2011 | AB  | L  | 4.11 a | 0.04 | 1.11 a | 0.44 | 1.13 b | 0.39 | 0.17 a | 0.00 | 0.33 a  | 0.18 | 2.06 a  | 1.04 |

**Table S2.** Means and standard deviations (SD) of biomass (Biomass: total rye biomass; Spike: spike rye biomass; Stem: stem rye biomass (all of them in kg/ha)) during ten years (2002–2011). Values within each column followed by different lowercase letters are significantly different according to Tukey's honest significance test with Holm-Bonferroni adjustment (0.05). Y: Year of sampling; T: Liming treatment (C: control; DL: dolomitic limestone; L: limestone).

| Y    | T  | Biomass |      | Spike  |      | Stem   |      |
|------|----|---------|------|--------|------|--------|------|
|      |    | Mean    | SD   | Mean   | SD   | Mean   | SD   |
| 2002 | C  | 2740 a  | 116  | 1190 a | 79.3 | 1550 a | 41.7 |
| 2002 | DL | 5230 b  | 513  | 2260 c | 181  | 2970 b | 340  |
| 2002 | L  | 4770 b  | 467  | 2030 b | 148  | 2740 b | 322  |
| 2003 | C  | 2100 a  | 228  | 836 a  | 62.4 | 1270 a | 166  |
| 2003 | DL | 3450 b  | 501  | 1430 b | 258  | 2030 b | 243  |
| 2003 | L  | 3440 b  | 117  | 1340 b | 73.0 | 2100 b | 76.0 |
| 2004 | C  | 1210 a  | 177  | 515 a  | 142  | 693 a  | 42.8 |
| 2004 | DL | 2970 c  | 295  | 1310 c | 110  | 1670 c | 187  |
| 2004 | L  | 2360 b  | 404  | 1000 b | 193  | 1350 b | 217  |
| 2005 | C  | 1580 a  | 185  | 578 a  | 27.9 | 997 a  | 159  |
| 2005 | DL | 2820 b  | 203  | 1180 b | 42.7 | 1640 b | 203  |
| 2005 | L  | 2920 b  | 116  | 1210 b | 36.4 | 1720 b | 104  |
| 2006 | C  | 2850 a  | 340  | 1350 a | 294  | 1500 a | 58.6 |
| 2006 | DL | 3970 b  | 105  | 1860 b | 63.0 | 2110 b | 45.4 |
| 2006 | L  | 4300 b  | 240  | 1990 b | 85.1 | 2320 c | 171  |
| 2007 | C  | 173 a   | 74.7 | 80.0 a | 35.5 | 93.4 a | 39.3 |
| 2007 | DL | 1000 b  | 200  | 431 b  | 96.7 | 565 b  | 121  |
| 2007 | L  | 1090 b  | 187  | 452 b  | 116  | 633 b  | 77.5 |
| 2008 | C  | 2430 a  | 365  | 968 a  | 151  | 1470 a | 220  |
| 2008 | DL | 2430 a  | 1250 | 1000 a | 488  | 1430 a | 766  |
| 2008 | L  | 2910 a  | 681  | 1220 a | 280  | 1690 a | 403  |
| 2009 | C  | 1760 a  | 45.5 | 842 a  | 42.7 | 915 a  | 57.1 |
| 2009 | DL | 2990 b  | 411  | 1470 b | 217  | 1510 b | 193  |
| 2009 | L  | 2830 b  | 433  | 1410 b | 208  | 1430 b | 233  |
| 2010 | C  | 3030 a  | 72.7 | 1300 a | 20.9 | 1720 a | 58.2 |
| 2010 | DL | 3850 b  | 294  | 1710 b | 133  | 2140 b | 186  |
| 2010 | L  | 3550 b  | 317  | 1610 b | 188  | 1950 b | 138  |
| 2011 | C  | 2440 a  | 279  | 1070 a | 106  | 1360 a | 173  |
| 2011 | DL | 3580 b  | 375  | 1520 b | 38.4 | 2060 b | 346  |
| 2011 | L  | 3210 b  | 400  | 1430 b | 140  | 1780 b | 267  |

**Table S3.** Means and standard deviations (SD) of calcium, magnesium and potassium content in rye biomass (Ca-Rye, Mg-Rye and K-Rye respectively; all of them in %) during ten years (2002–2011). Values within each column followed by different lowercase letters are significantly different according to Tukey's honest significance test with Holm-Bonferroni adjustment (0.05). Y: Year of sampling; T: Liming treatment (C: control; DL: dolomitic limestone; L: limestone).

| Y    | T  | Ca-Rye  |      | Mg-Rye |      | K-Rye   |      |
|------|----|---------|------|--------|------|---------|------|
|      |    | Mean    | SD   | Mean   | SD   | Mean    | SD   |
| 2002 | C  | 0.10 a  | 0.04 | 0.04 a | 0.01 | 0.73 b  | 0.09 |
| 2002 | DL | 0.11 a  | 0.02 | 0.18 b | 0.06 | 0.48 a  | 0.10 |
| 2002 | L  | 0.15 a  | 0.04 | 0.05 a | 0.01 | 0.59 ab | 0.15 |
| 2003 | C  | 0.17 b  | 0.02 | 0.03 a | 0.01 | 0.29 a  | 0.05 |
| 2003 | DL | 0.13 a  | 0.03 | 0.12 b | 0.03 | 0.42 b  | 0.02 |
| 2003 | L  | 0.20 b  | 0.03 | 0.04 a | 0.00 | 0.37 b  | 0.02 |
| 2004 | C  | 0.13 a  | 0.03 | 0.02 a | 0.01 | 0.54 a  | 0.03 |
| 2004 | DL | 0.14 a  | 0.03 | 0.13 b | 0.03 | 0.55 a  | 0.04 |
| 2004 | L  | 0.22 b  | 0.04 | 0.03 a | 0.00 | 0.47 a  | 0.08 |
| 2005 | C  | 0.14 a  | 0.06 | 0.03 a | 0.00 | 0.79 a  | 0.21 |
| 2005 | DL | 0.15 a  | 0.05 | 0.12 b | 0.04 | 0.63 a  | 0.01 |
| 2005 | L  | 0.22 b  | 0.03 | 0.03 a | 0.01 | 0.73 a  | 0.08 |
| 2006 | C  | 0.08 a  | 0.01 | 0.02 a | 0.01 | 0.46 b  | 0.01 |
| 2006 | DL | 0.09 a  | 0.03 | 0.08 b | 0.02 | 0.38 a  | 0.08 |
| 2006 | L  | 0.14 b  | 0.04 | 0.03 a | 0.00 | 0.45 ab | 0.04 |
| 2007 | C  | 0.07 a  | 0.01 | 0.02 a | 0.01 | 0.48 a  | 0.08 |
| 2007 | DL | 0.20 ab | 0.13 | 0.11 c | 0.02 | 0.52 a  | 0.17 |
| 2007 | L  | 0.25 b  | 0.11 | 0.04 b | 0.00 | 0.58 a  | 0.13 |
| 2008 | C  | 0.12 a  | 0.02 | 0.02 a | 0.00 | 0.65 a  | 0.04 |
| 2008 | DL | 0.17 b  | 0.04 | 0.09 c | 0.02 | 0.73 a  | 0.22 |
| 2008 | L  | 0.20 b  | 0.01 | 0.04 b | 0.01 | 0.67 a  | 0.04 |
| 2009 | C  | 0.10 a  | 0.01 | 0.02 a | 0.01 | 0.46 b  | 0.05 |
| 2009 | DL | 0.19 b  | 0.01 | 0.10 c | 0.01 | 0.37 a  | 0.02 |
| 2009 | L  | 0.20 b  | 0.02 | 0.04 b | 0.01 | 0.35 a  | 0.03 |
| 2010 | C  | 0.12 a  | 0.00 | 0.02 a | 0.01 | 0.45 a  | 0.07 |
| 2010 | DL | 0.18 b  | 0.04 | 0.11 c | 0.00 | 0.39 a  | 0.10 |
| 2010 | L  | 0.24 c  | 0.03 | 0.05 b | 0.02 | 0.45 a  | 0.08 |
| 2011 | C  | 0.11 a  | 0.04 | 0.02 a | 0.01 | 0.44 a  | 0.07 |
| 2011 | DL | 0.13 a  | 0.06 | 0.07 c | 0.02 | 0.44 a  | 0.10 |
| 2011 | L  | 0.08 a  | 0.02 | 0.04 b | 0.00 | 0.39 a  | 0.13 |
